# Supplementary material
Source: PubMed Central journal article supplement (PMC11028830)
Supplement: 262_2016_1901_MOESM1_ESM.pdf [file 262_2016_1901_MOESM1_ESM.pdf]

# Supplemental Figure S1

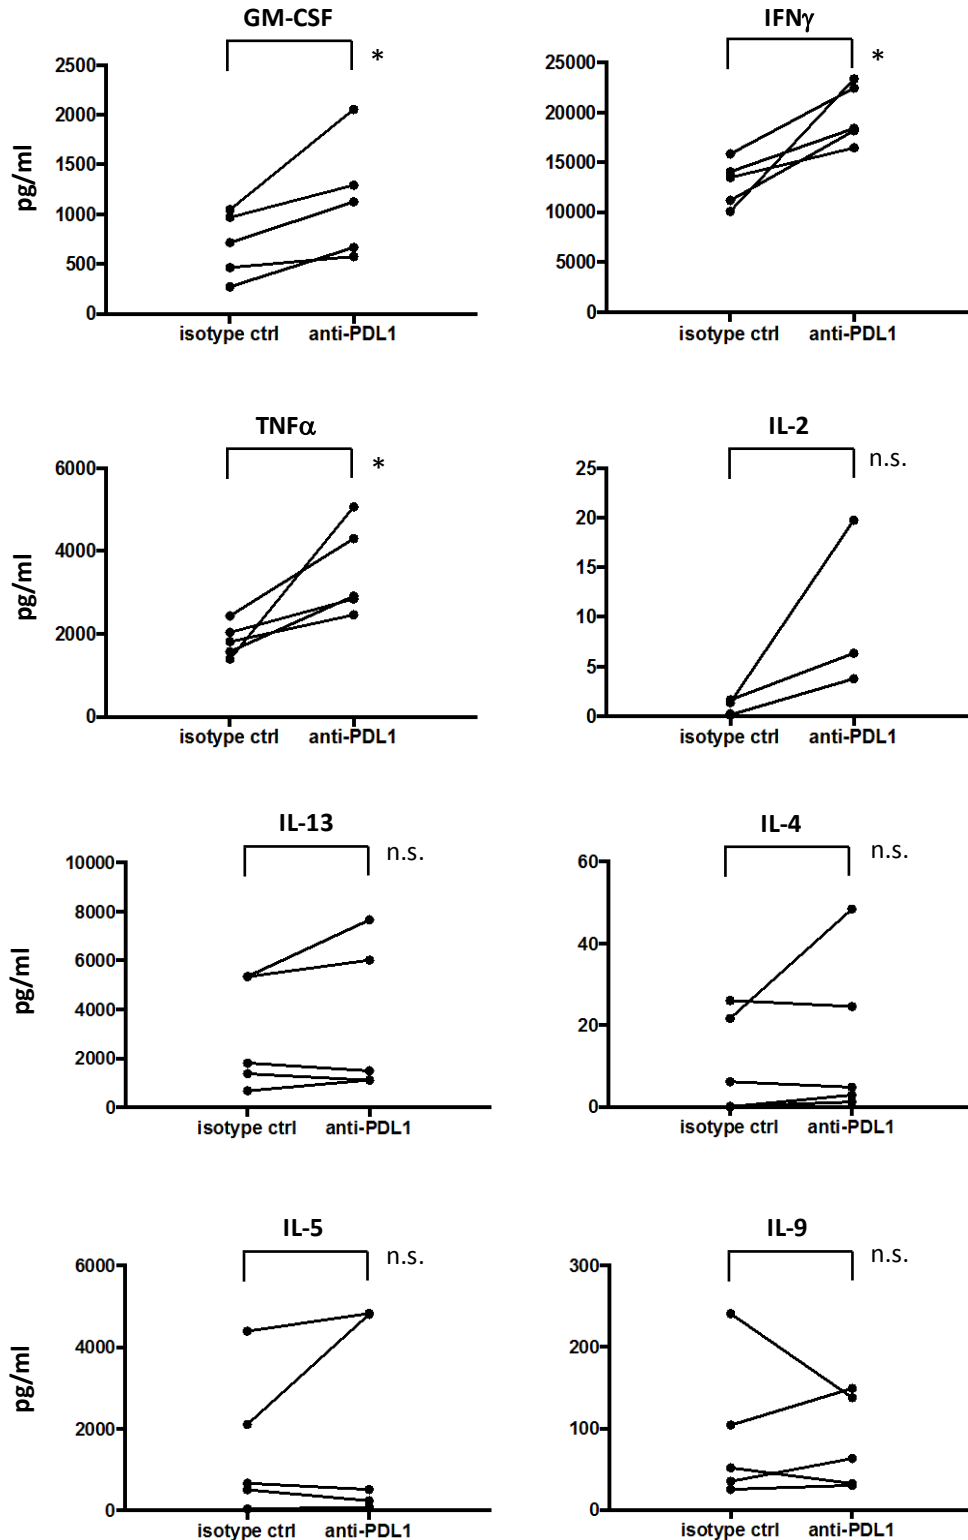

## Supplemental Figure S1. Multiplex assay of cytokine secretion following iNKT cell restimulation with PDL1-blocked APCs.

PBMCs from healthy donors were stimulated with  $\alpha$ GalCer-pulsed APCs with anti-PDL1 antibody or isotype control. On day 7, iNKT cells were purified and  $2 \times 10^5$  cells were stimulated with  $1 \times 10^6$  APCs the following day. Supernatants were collected after 24 hours and Multiplex assays were performed. P values were calculated by paired t tests. \*:  $p < 0.05$ . isotype ctrl: isotype control, anti-PDL1: anti-PDL1 antibody.
